# Supplementary material for: Bridged nucleic acid conjugates at 6′-thiol: synthesis, hybridization properties and nuclease resistances
Source: Royal Society of Chemistry journal article supplement (doi:10.1039/c1ob05469d), 2011-01-01
Supplement: c1ob05469d.pdf [file c1ob05469d.pdf]

Supporting information

## **Bridged Nucleic Acid Conjugates at 6'-Thiol: Synthesis, Hybridization Properties and Nuclease Resistances**

Kazuto Mori, Tetsuya Kodama\*, Takeshi Baba and Satoshi Obika\*

*\*Graduate School of Pharmaceutical Sciences, Osaka University, 1-6 Yamadaoka, Suita,  
Osaka, 565-0871, Japan.*

*Fax: +81 6 6879 8204; Tel: +81 6 6879 8200*

*E-mail: kodama@phs.osaka-u.ac.jp; obika@phs.osaka-u.ac.jp*

### **Contents**

1.  $^1\text{H}$ -,  $^{13}\text{C}$ - and  $^{31}\text{P}$ -NMR spectra of new compounds
2. HPLC, MALDI-MS and ESI-MS data for oligonucleotide conjugates
3. UV melting profiles

# 1. $^1\text{H}$ -, $^{13}\text{C}$ - and $^{31}\text{P}$ -NMR spectra of new compounds

## Compound 2 ( $^1\text{H}$ -NMR)

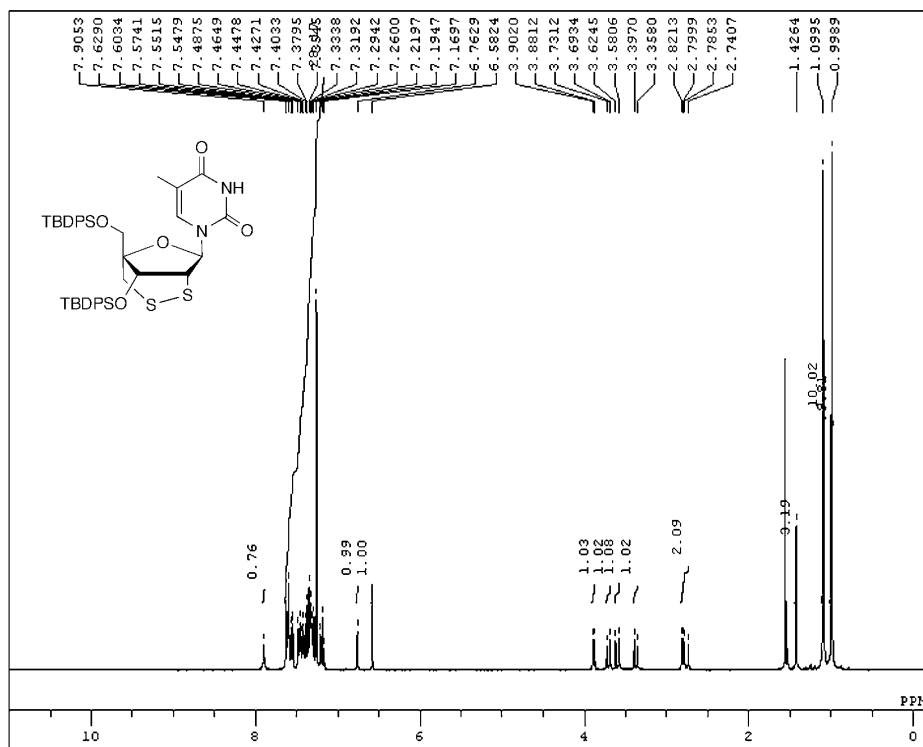

## Compound 2 ( $^{13}\text{C}$ -NMR)

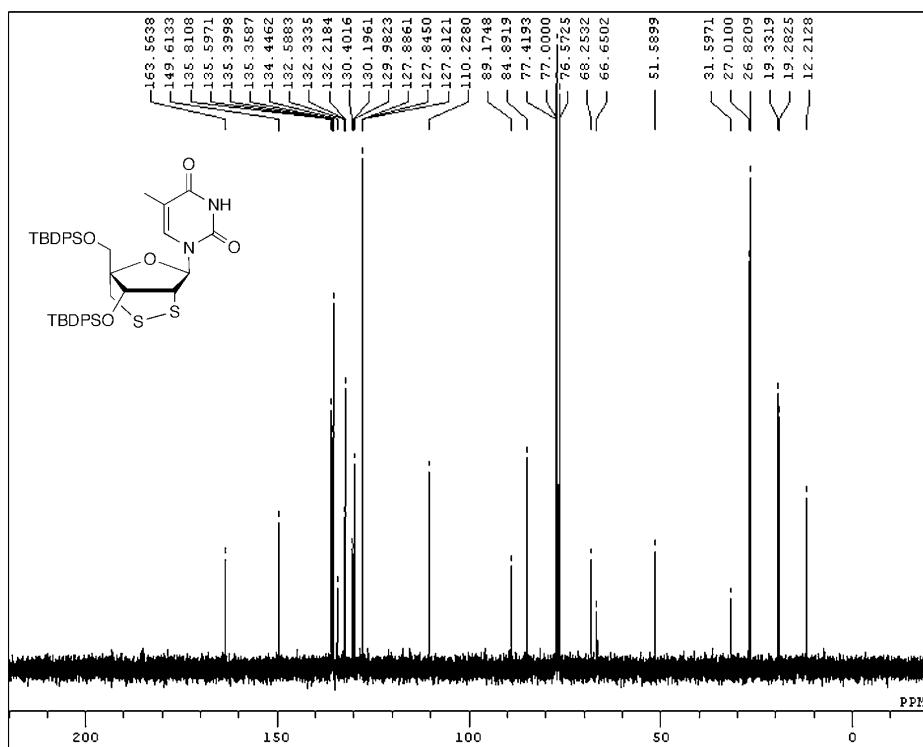

Compound **3** ( $^1\text{H-NMR}$ )

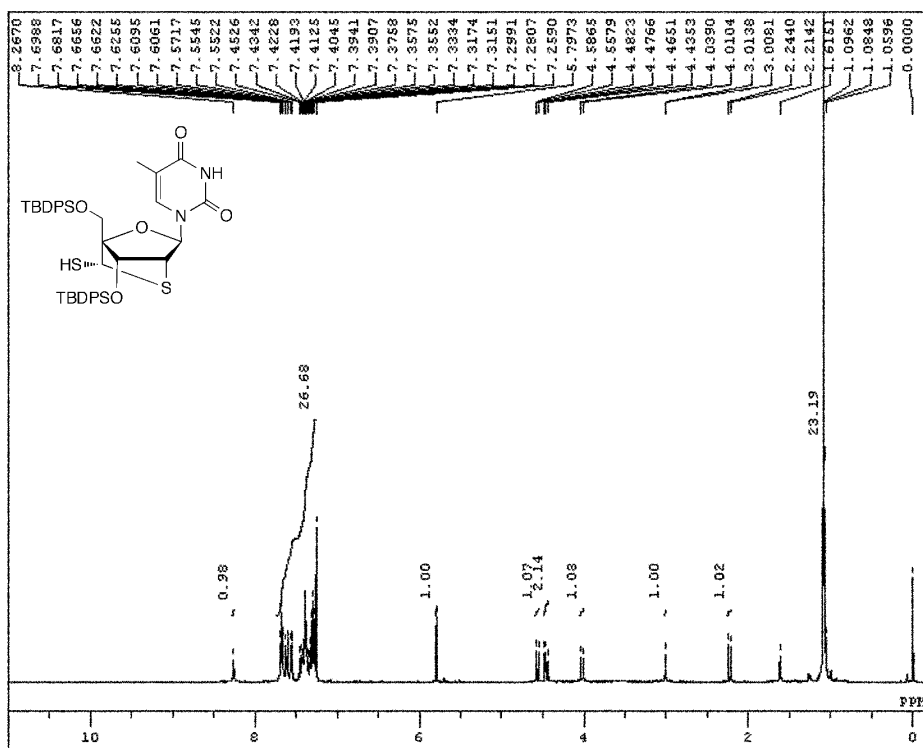

Compound **3** ( $^{13}\text{C-NMR}$ )

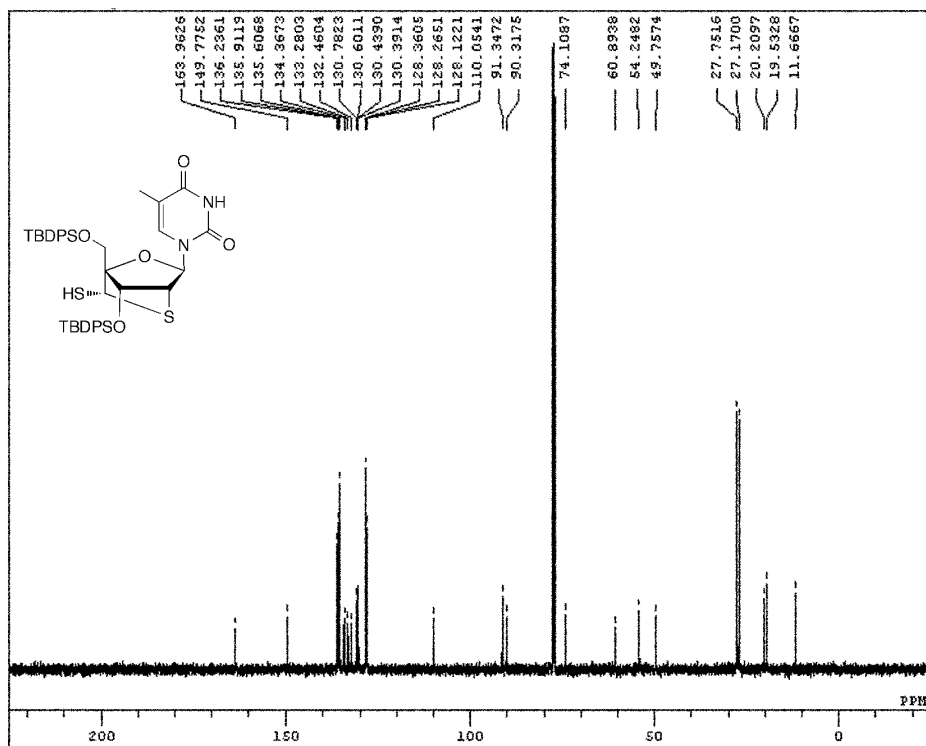

Compound 4 ( $^1\text{H-NMR}$ )

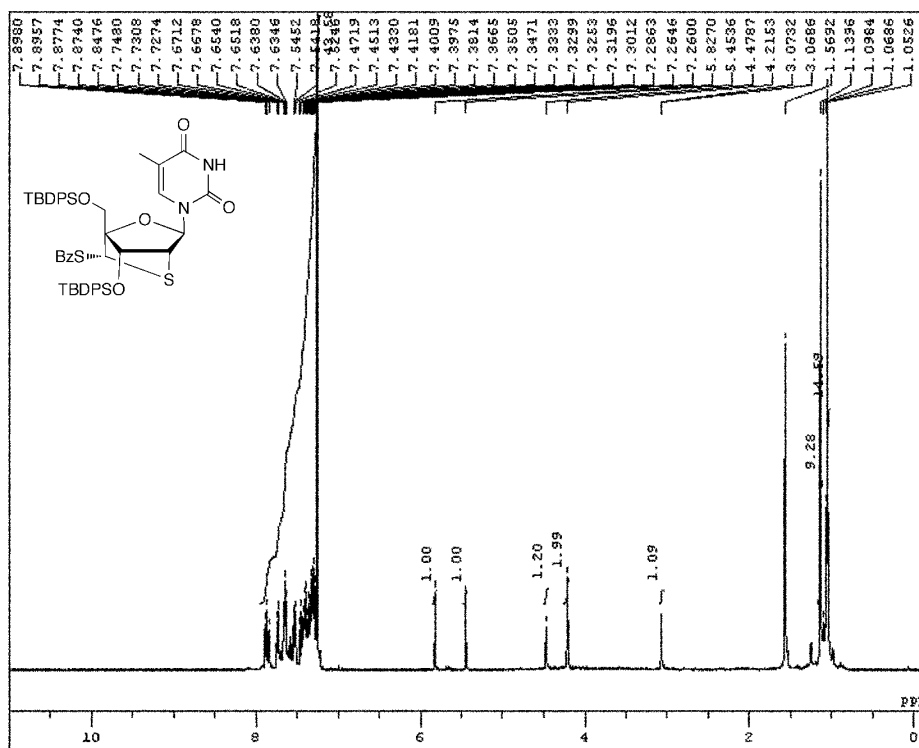

Compound 4 ( $^{13}\text{C-NMR}$ )

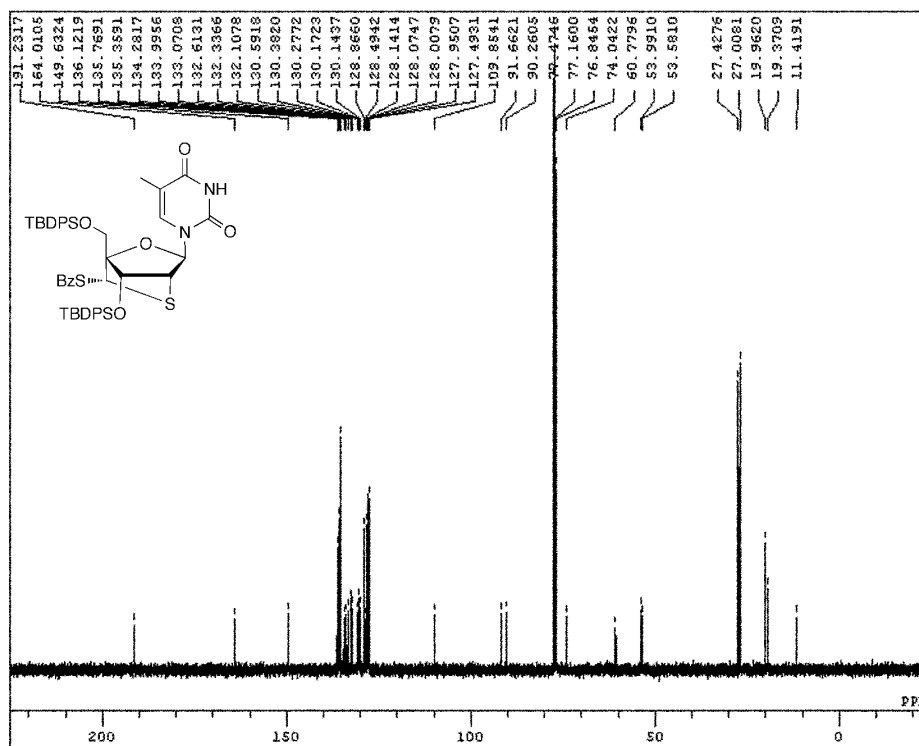

Compound **5** ( $^1\text{H-NMR}$ )

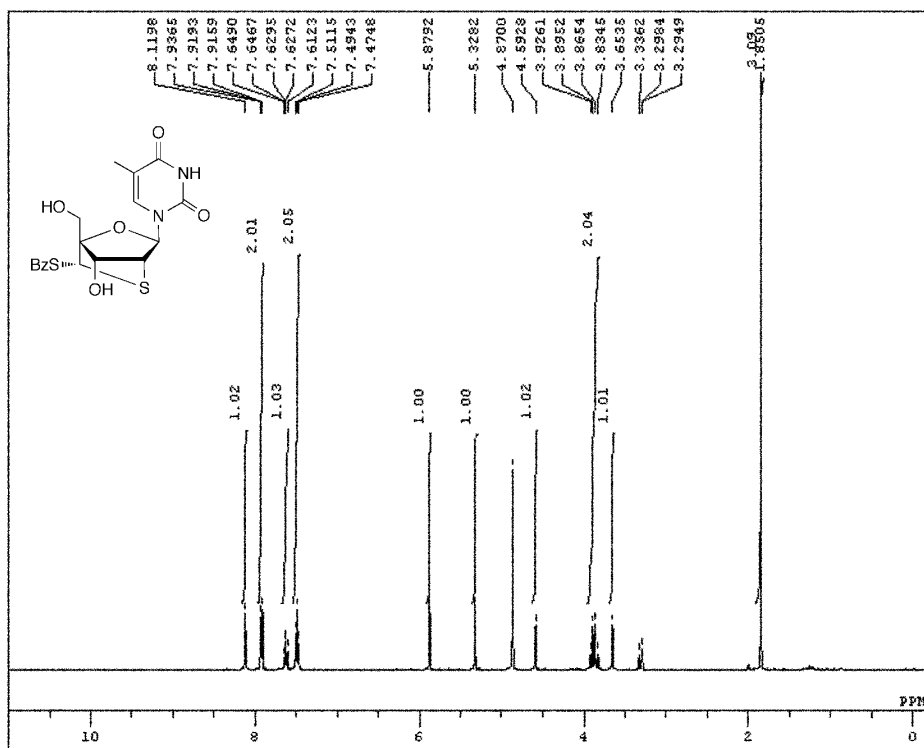

Compound **5** ( $^{13}\text{C-NMR}$ )

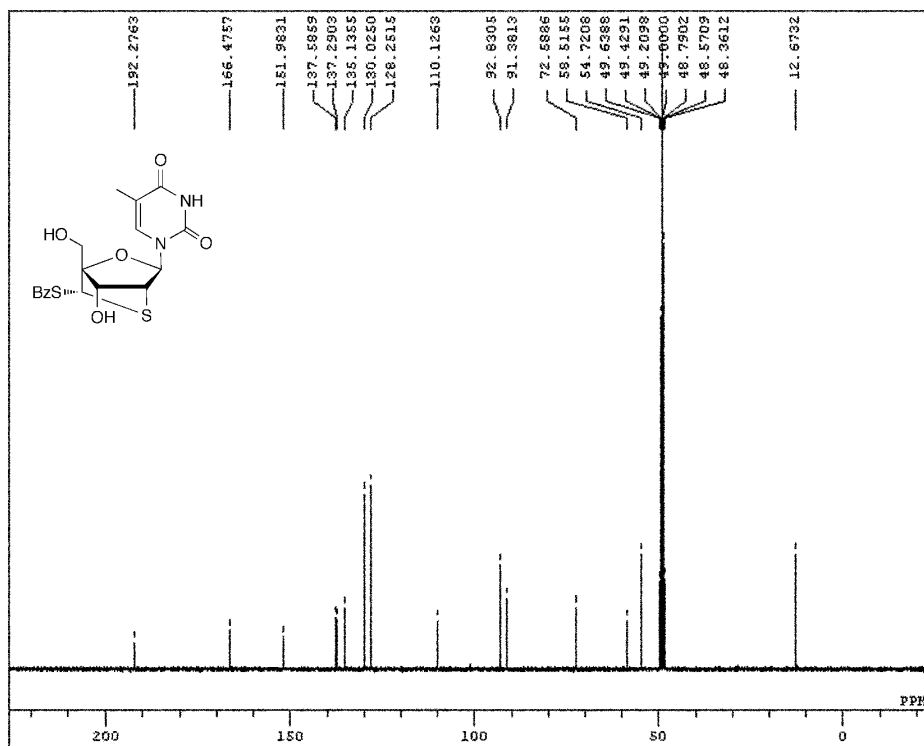

Compound 6 (<sup>1</sup>H-NMR)

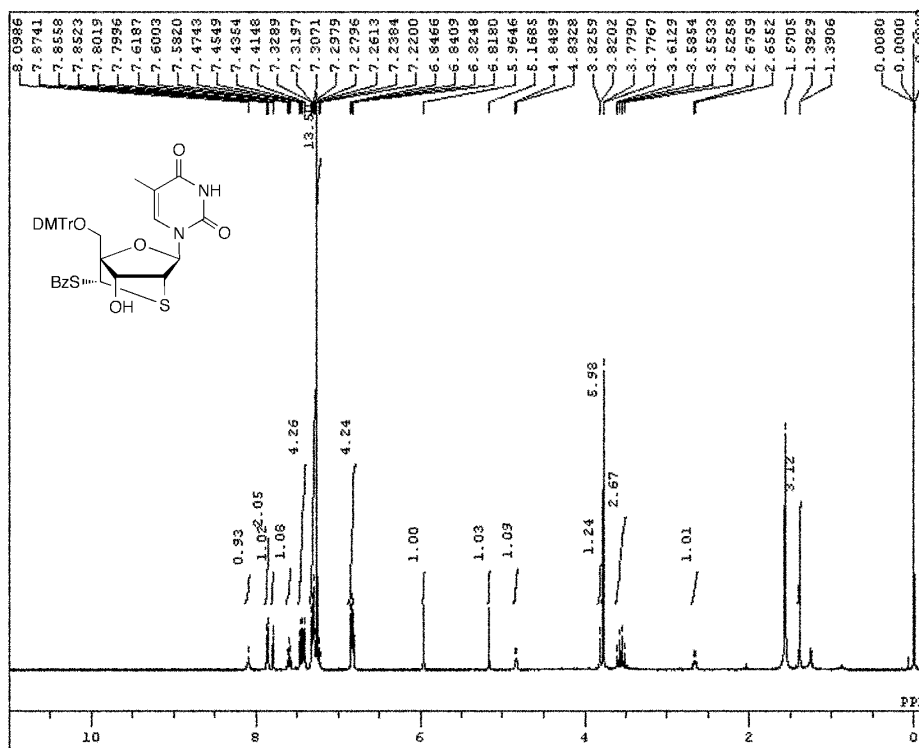

Compound 6 (<sup>13</sup>C-NMR)

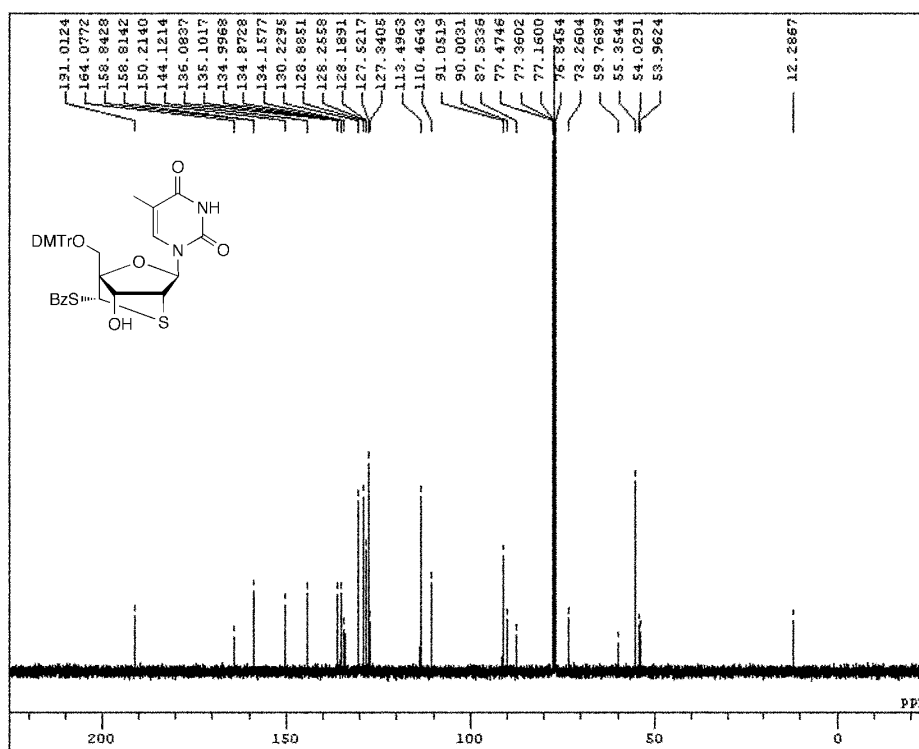

Compound 7 ( $^{31}\text{P}$ -NMR)

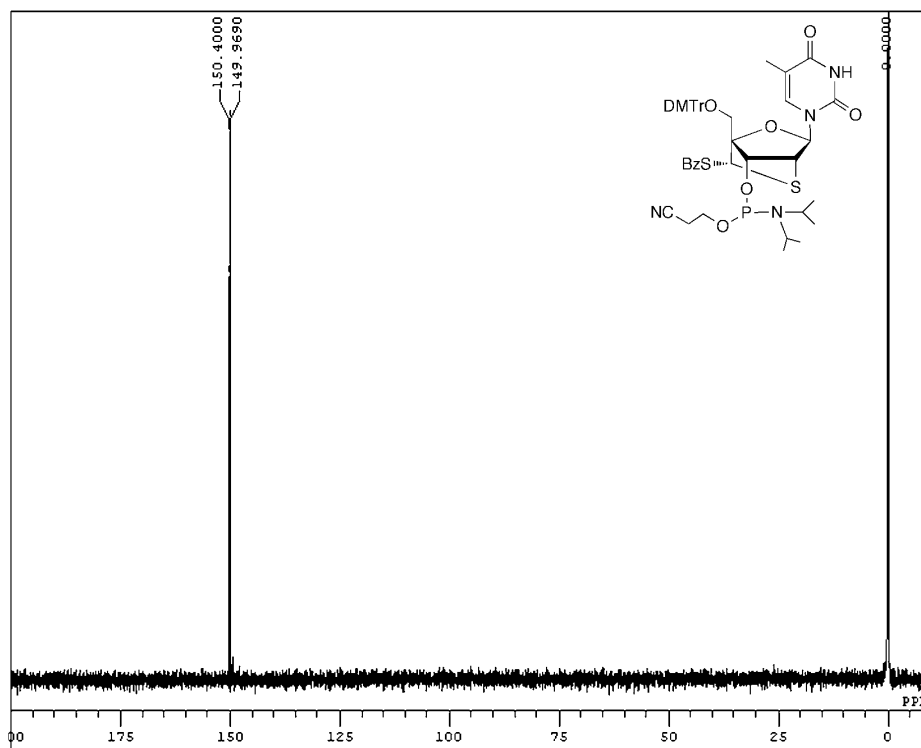

Compound 3 (NOE experiment)

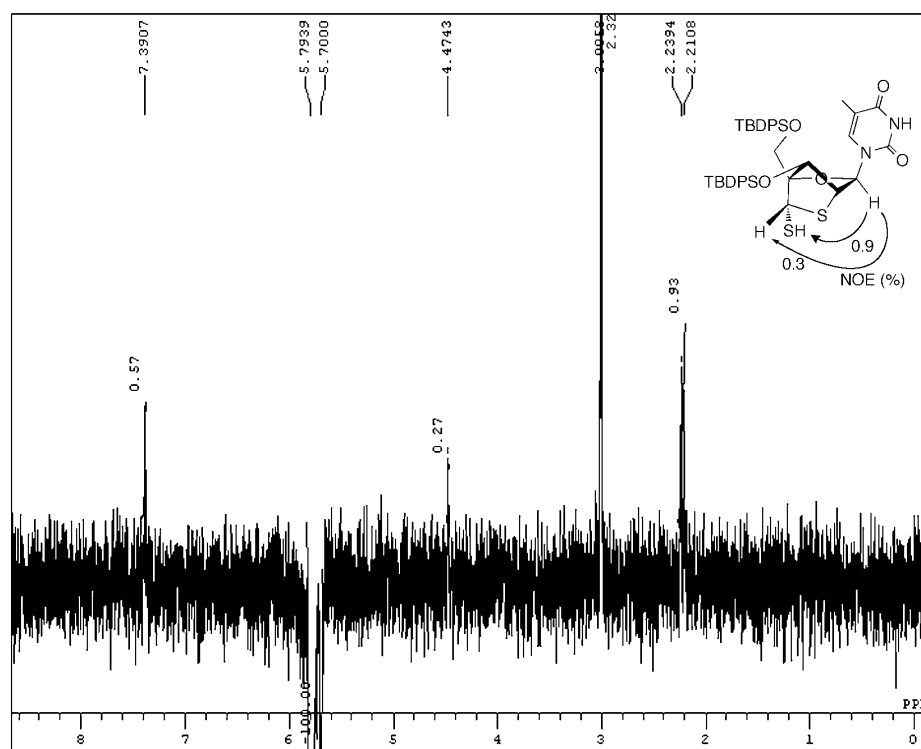

## 2. HPLC- and MALDI MS-data for oligonucleotide conjugates

### 2-1. RP-HPLC analyses of solution-phase conjugations

Each reaction mixture of conjugation was analyzed by RP-HPLC using XBridge™ Shield RP 18 2.5 μm (4.6 x 50 mm) with a linear gradient of MeCN (6 to 12 % for ON 12, 14, 17 and 18, 10 to 50 % for ON 15, or 30 to 80% for ON 19 over 30 min) in 0.1 M triethylammonium acetate (pH = 7.0).

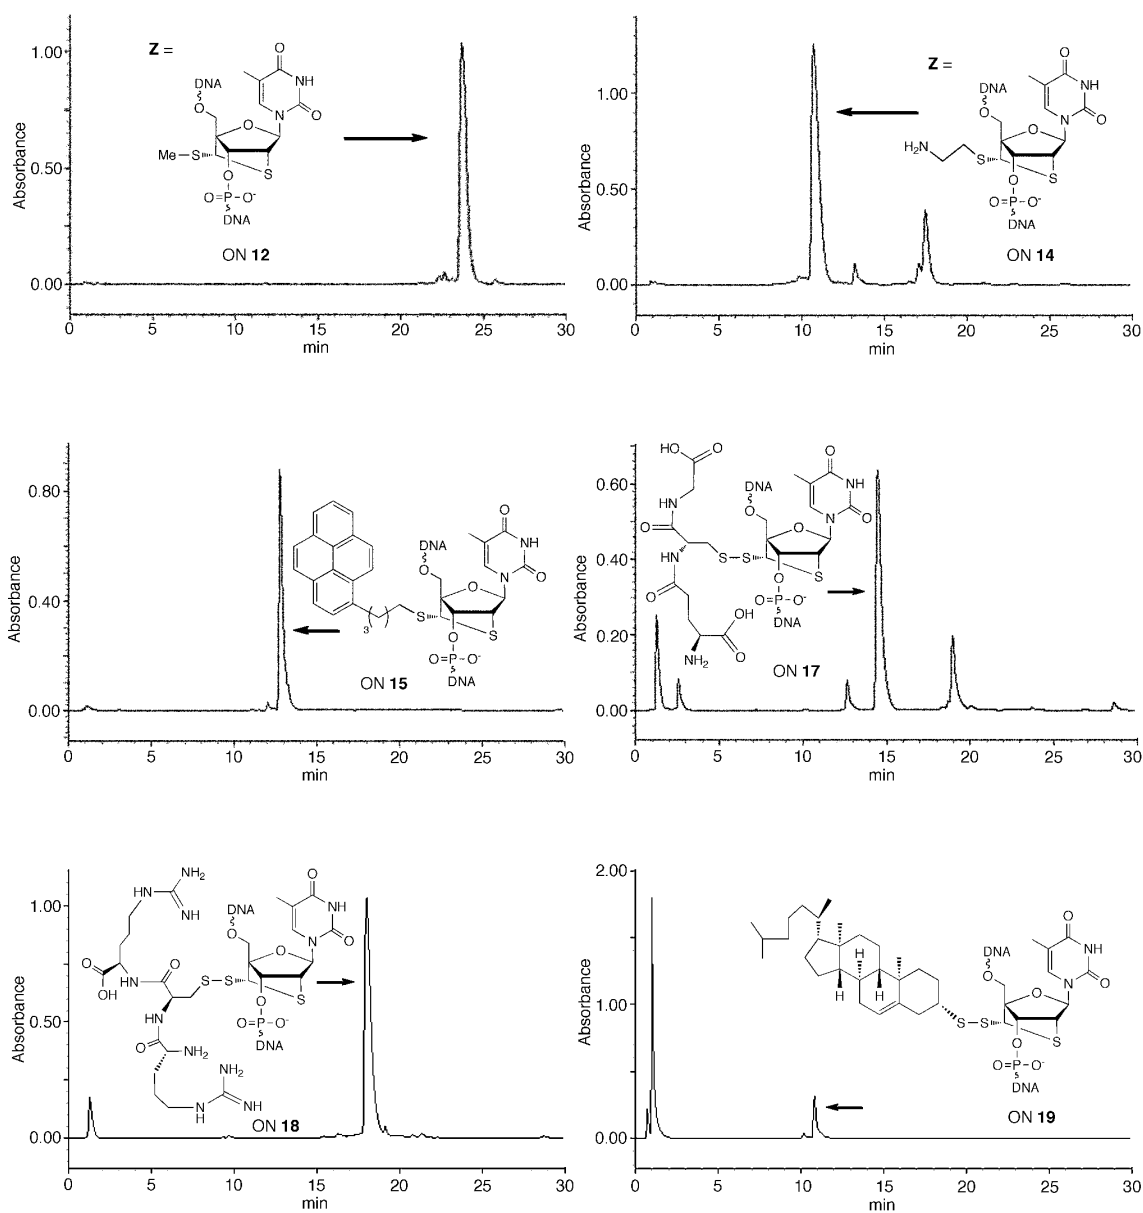



## 2-2. RP-HPLC analyses of purified ONs

Each purified ON was analyzed by RP-HPLC using XBridge™ Shield RP 18 2.5  $\mu\text{m}$  (4.6 x 50 mm) with a linear gradient of MeCN (6 to 12 % for ON **12-14** and **16-18**, 15 to 25 % for ON **15**, 30 to 80% for ON **19**, or 8 to 14 % for ON **9** and **20-23** over 30 min) in 0.1 M triethylammonium acetate (pH = 7.0).

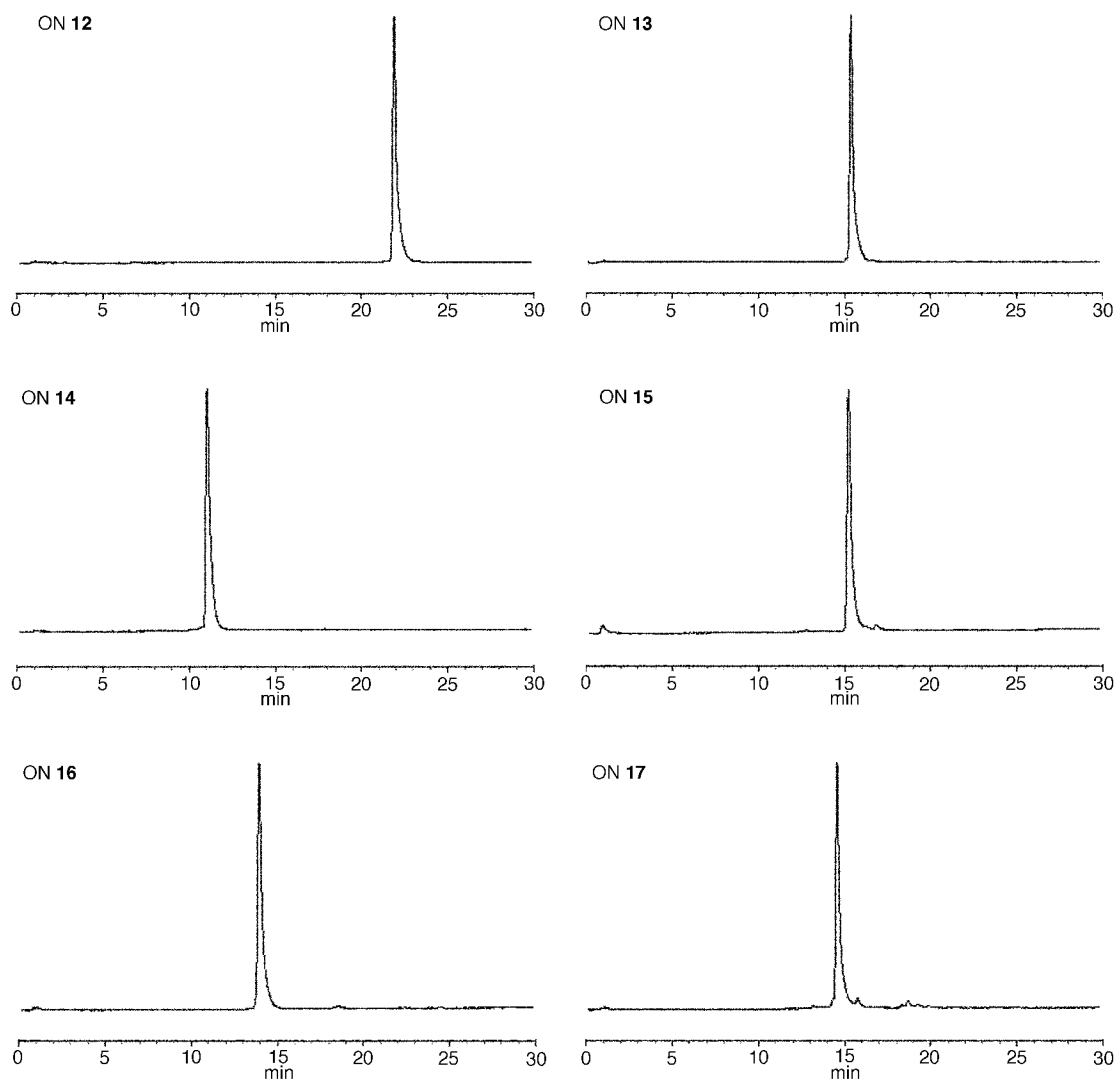

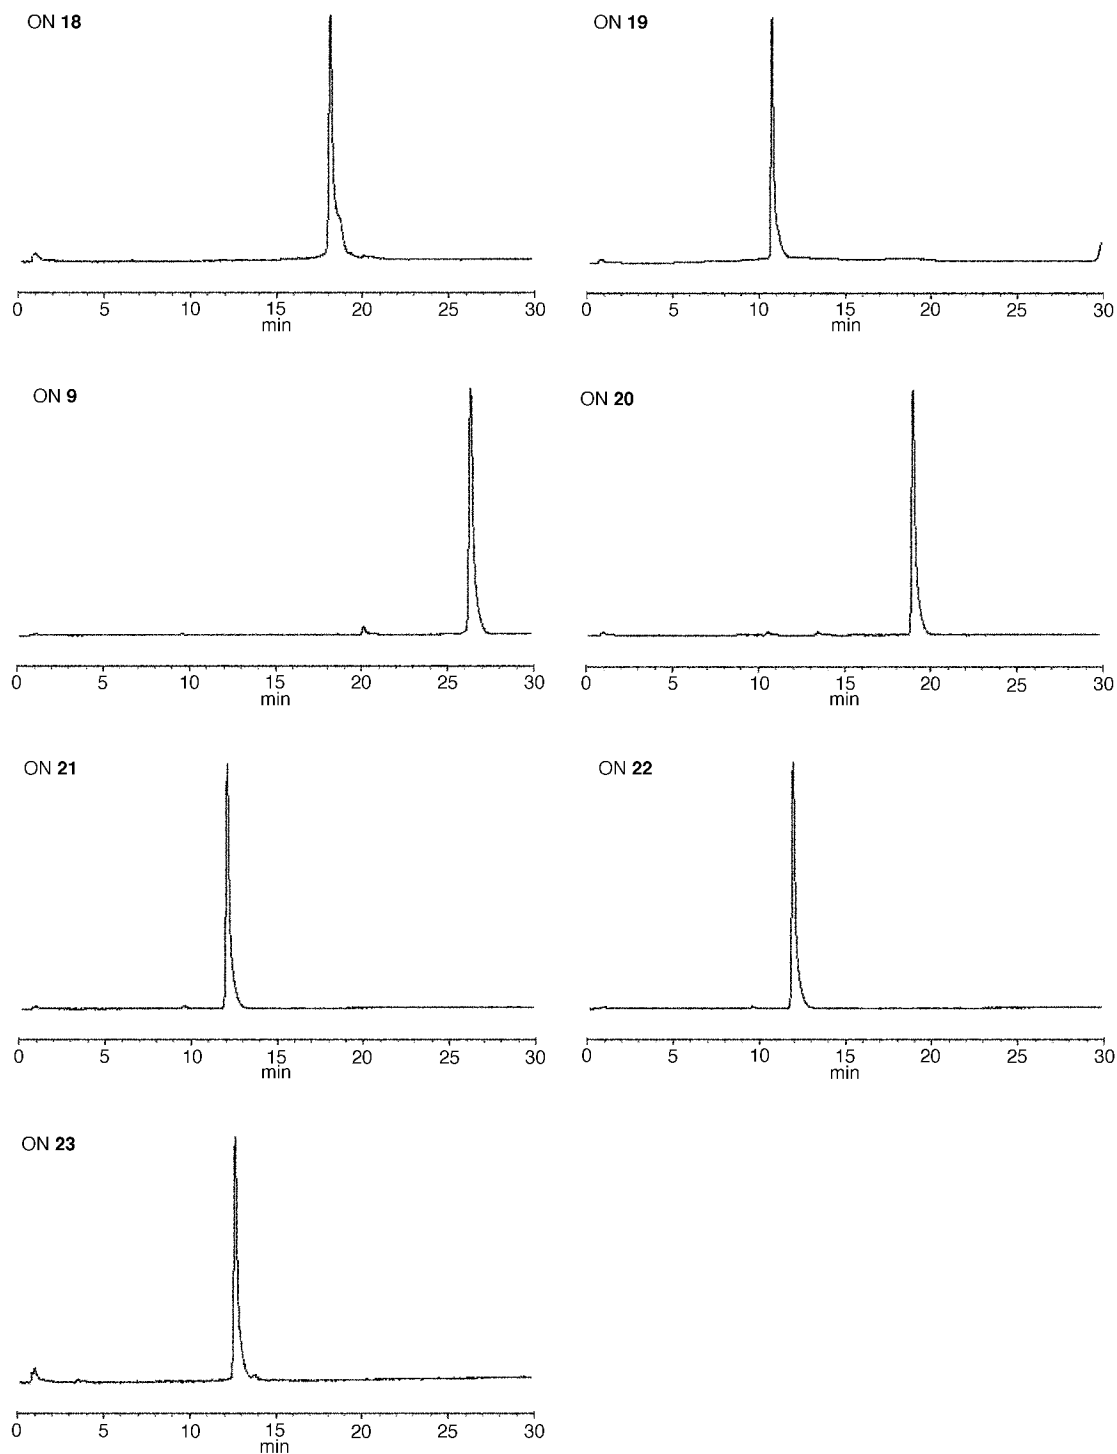

The percent purities of ONs calculated from UV absorption at 260 nm were over 90%.

### 2-3. MALDI-TOF-MS data for ON 8-13, 15-23 and ESI-MS datum for ON 14

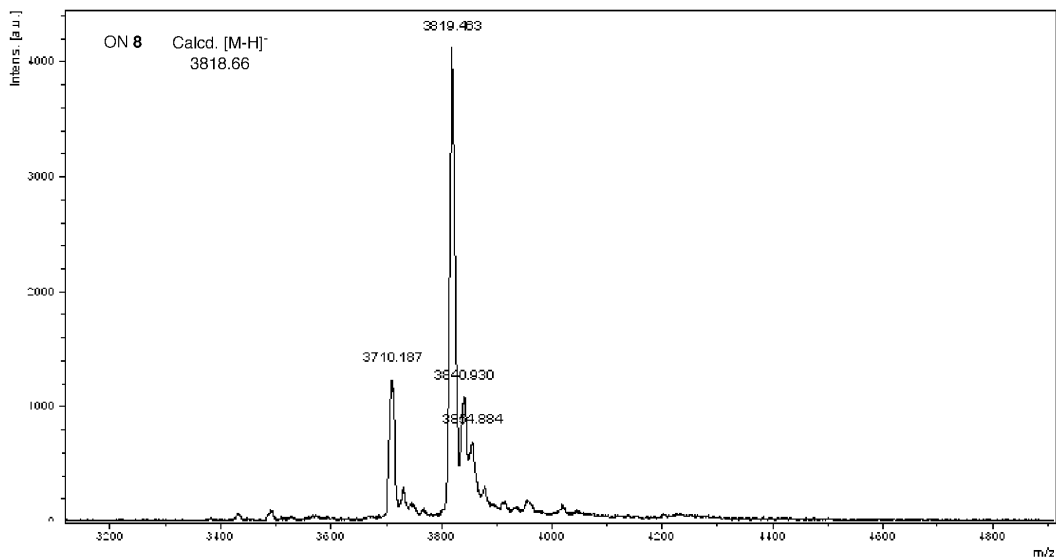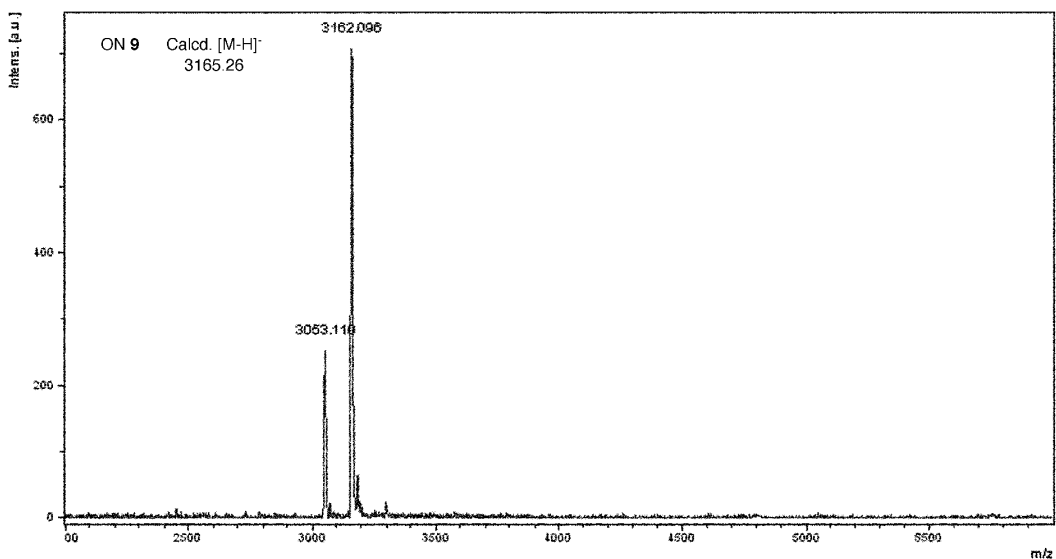

The peaks corresponding to 110 lower molecular weights than ON 8 and 9 were found in the MS data probably because the disulfide linkages were cleaved on MALDI-MS plate.

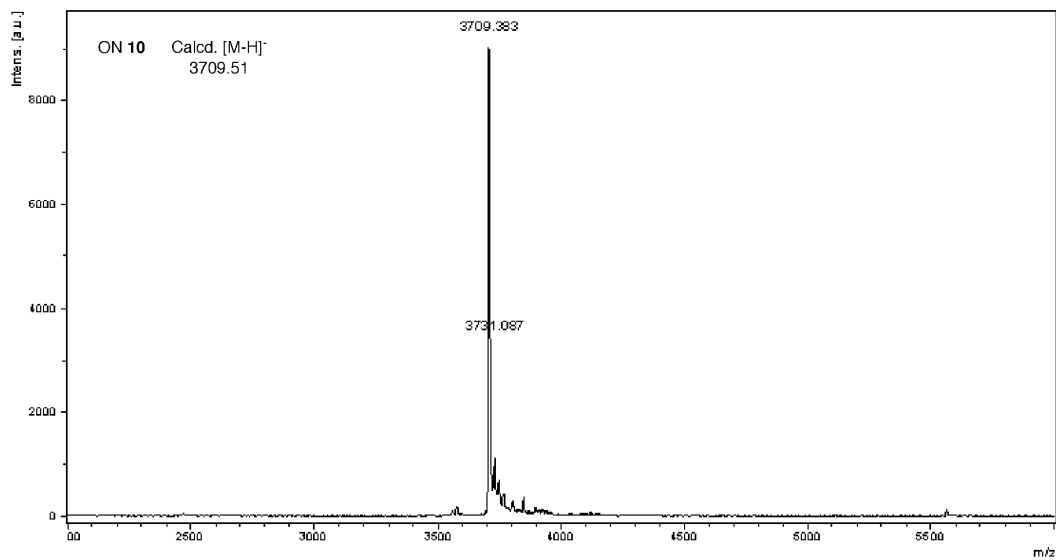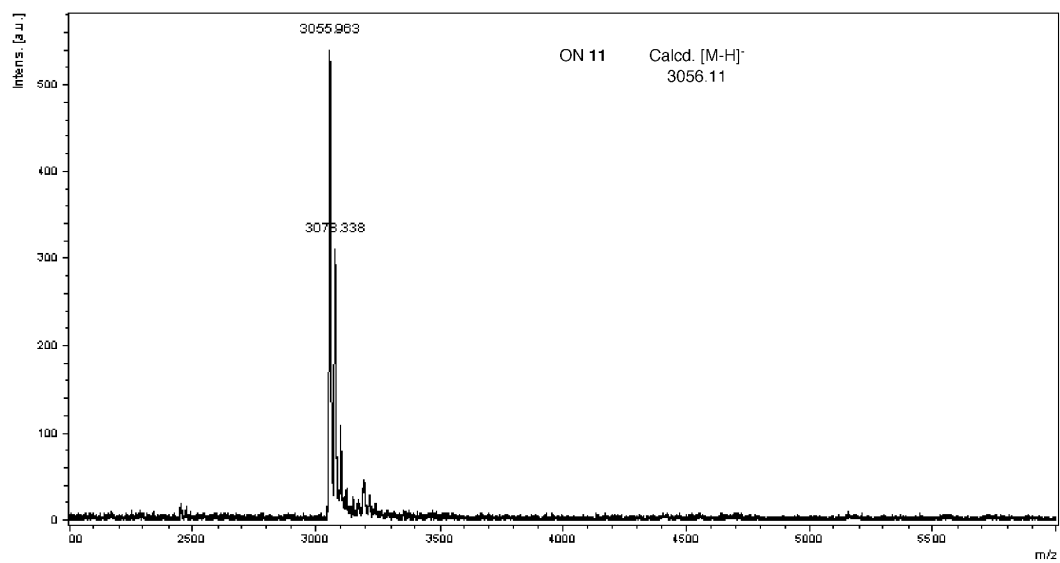

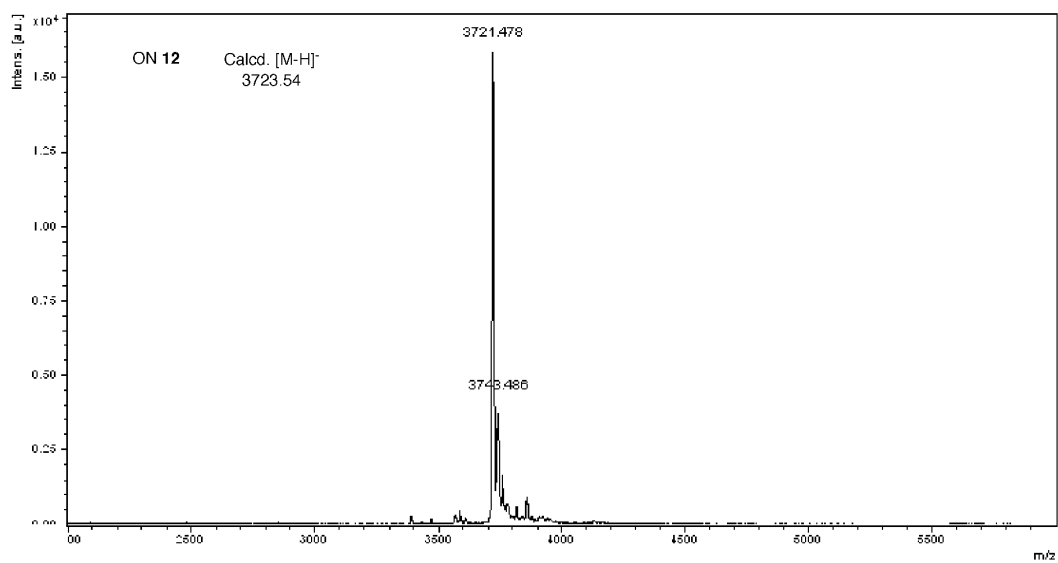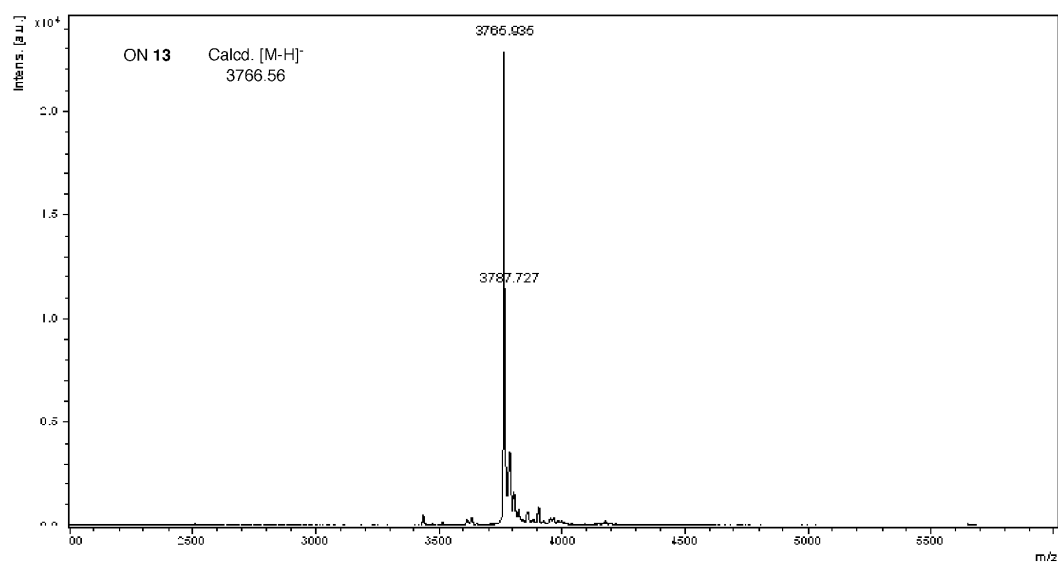

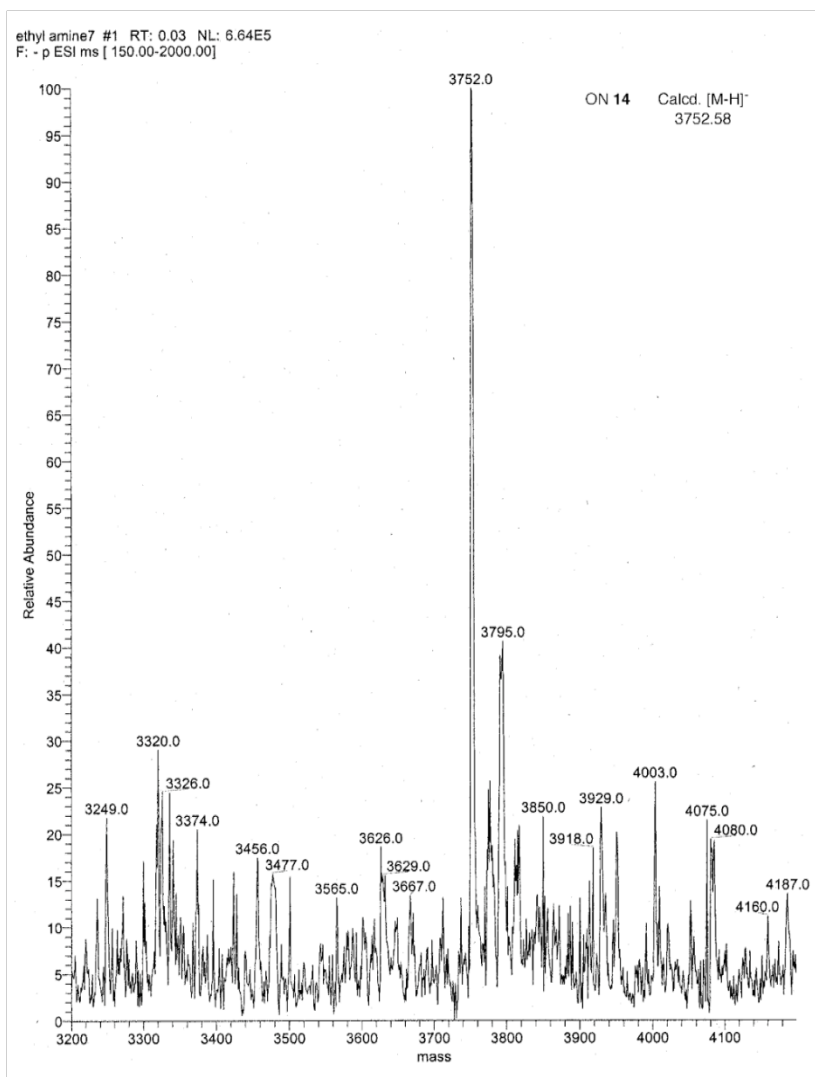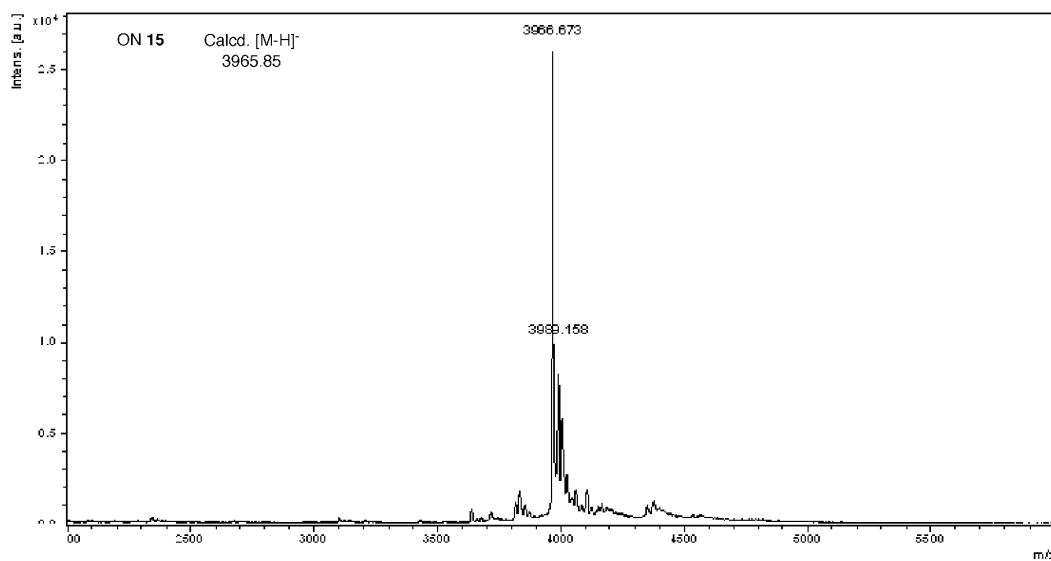

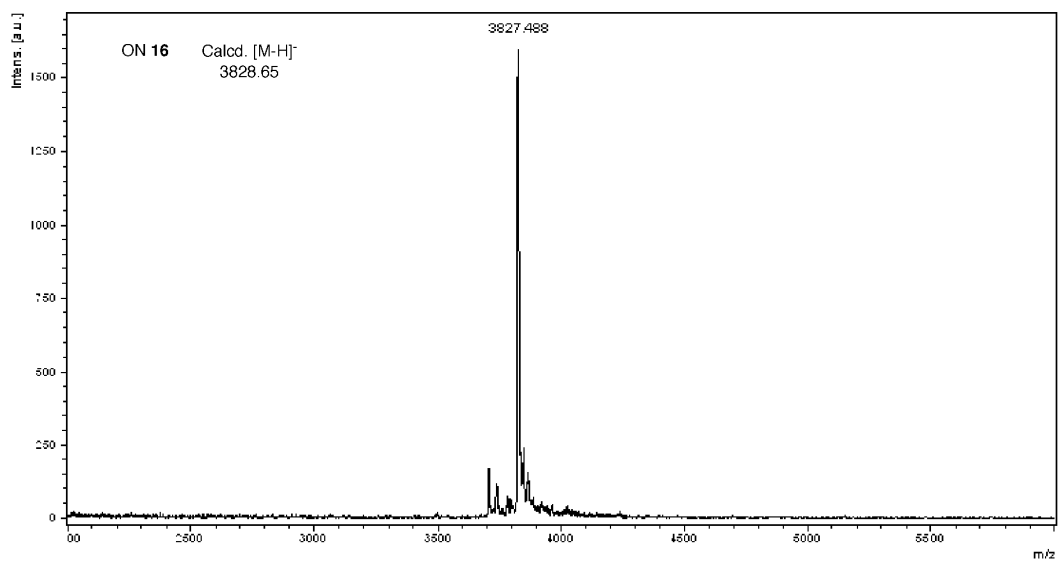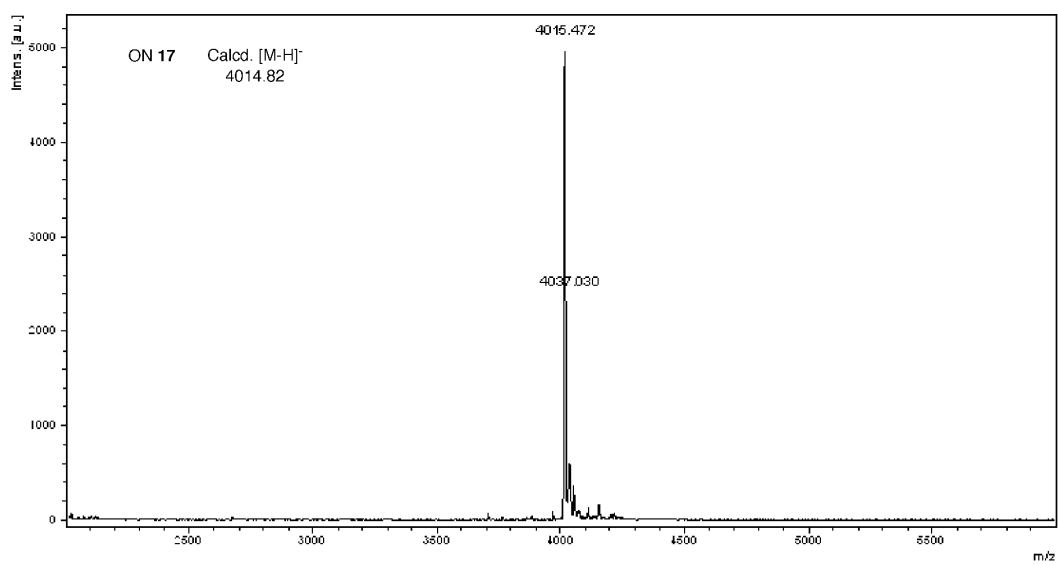

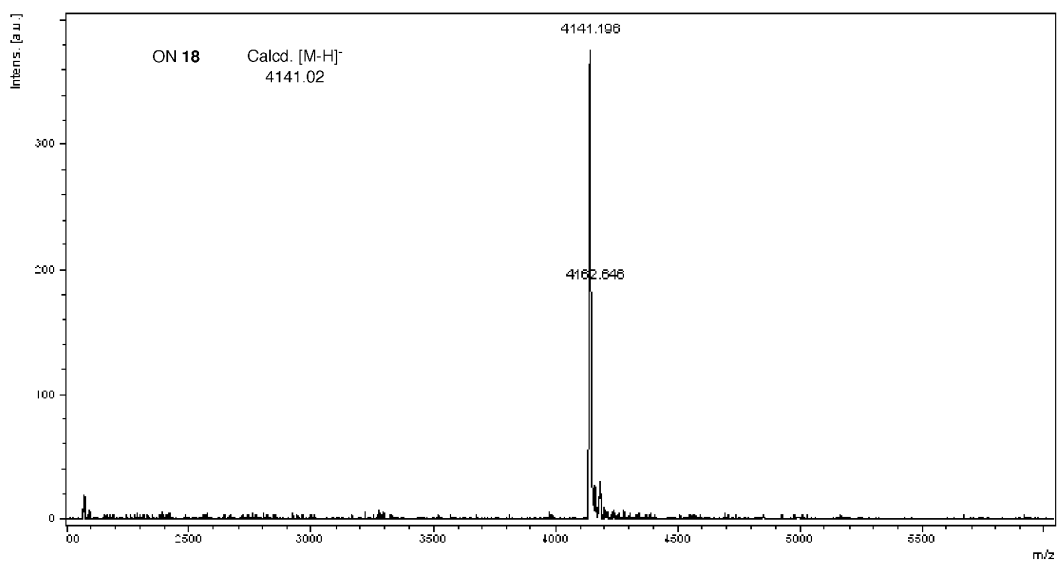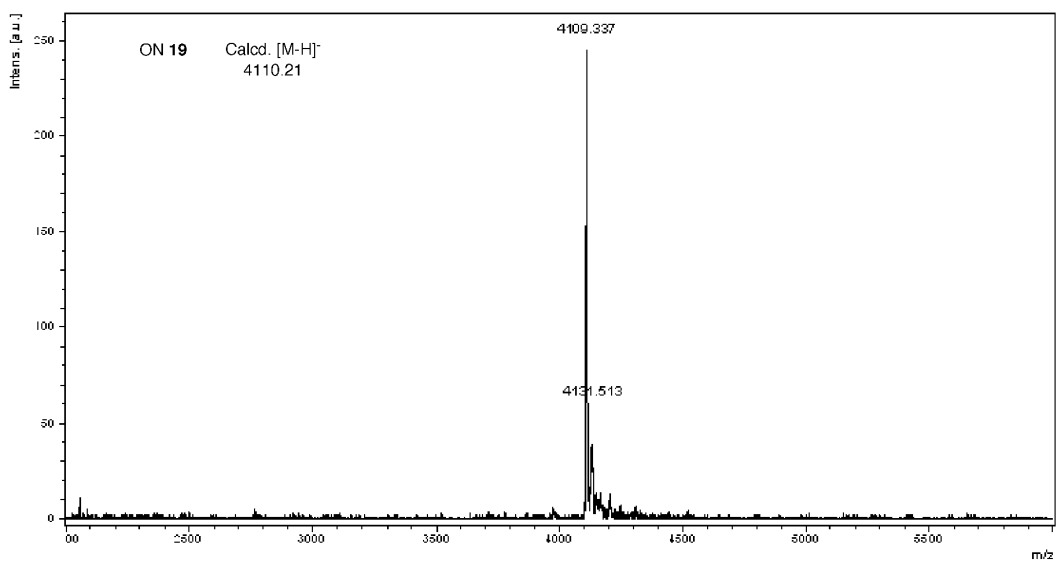



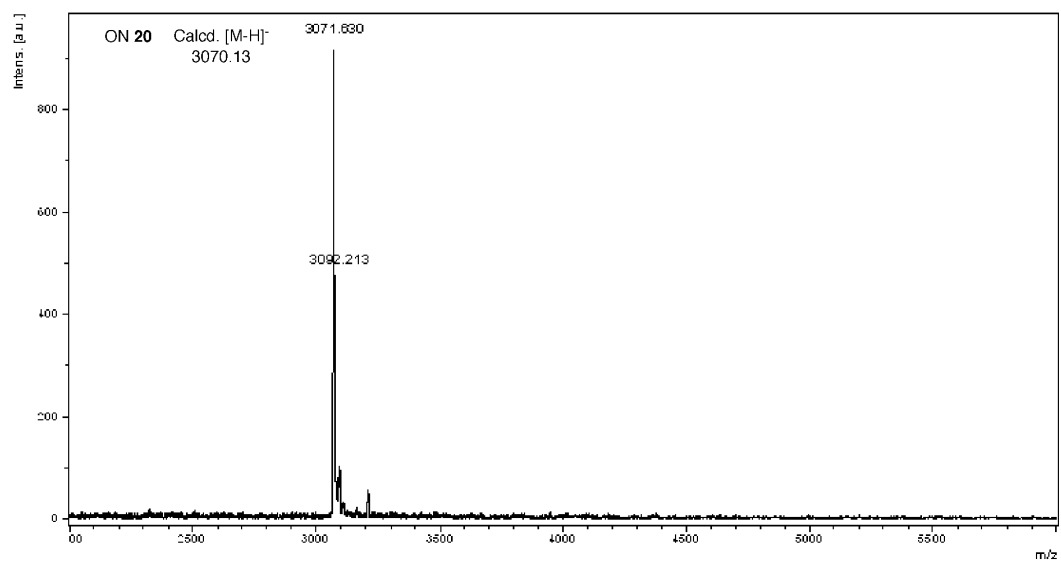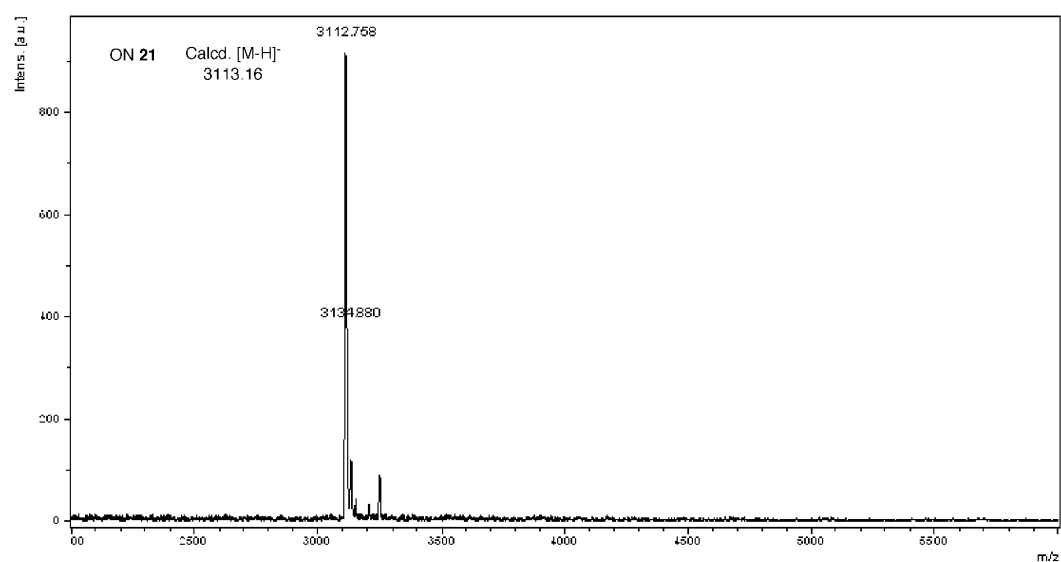

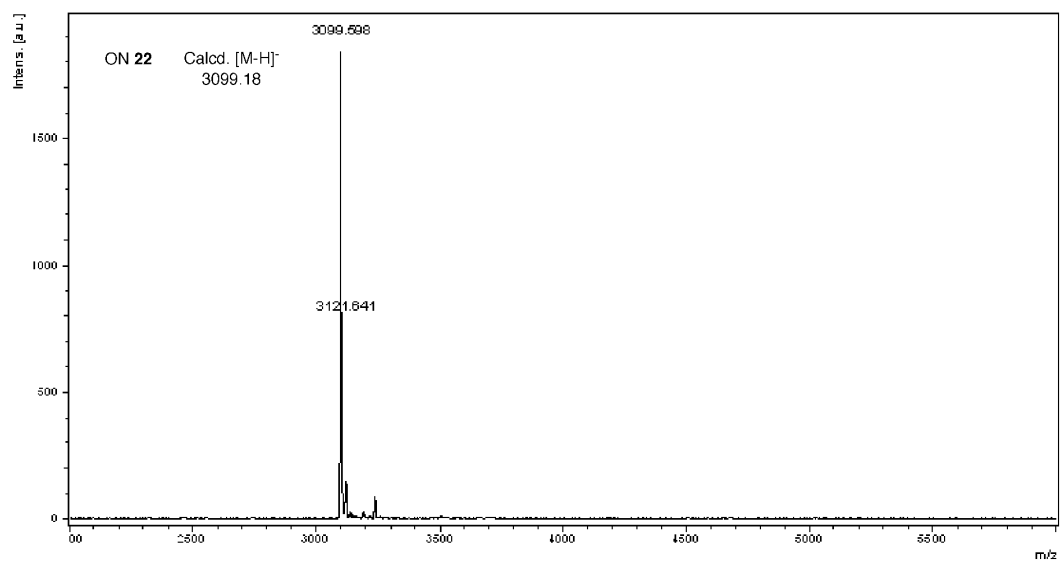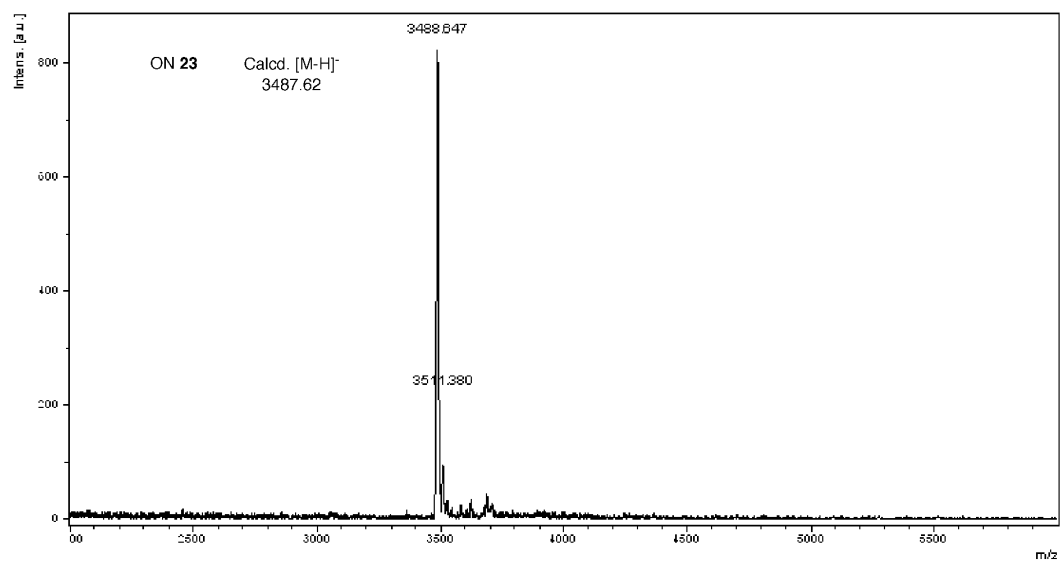

### 3. UV melting profiles (Figure S1 and S2)

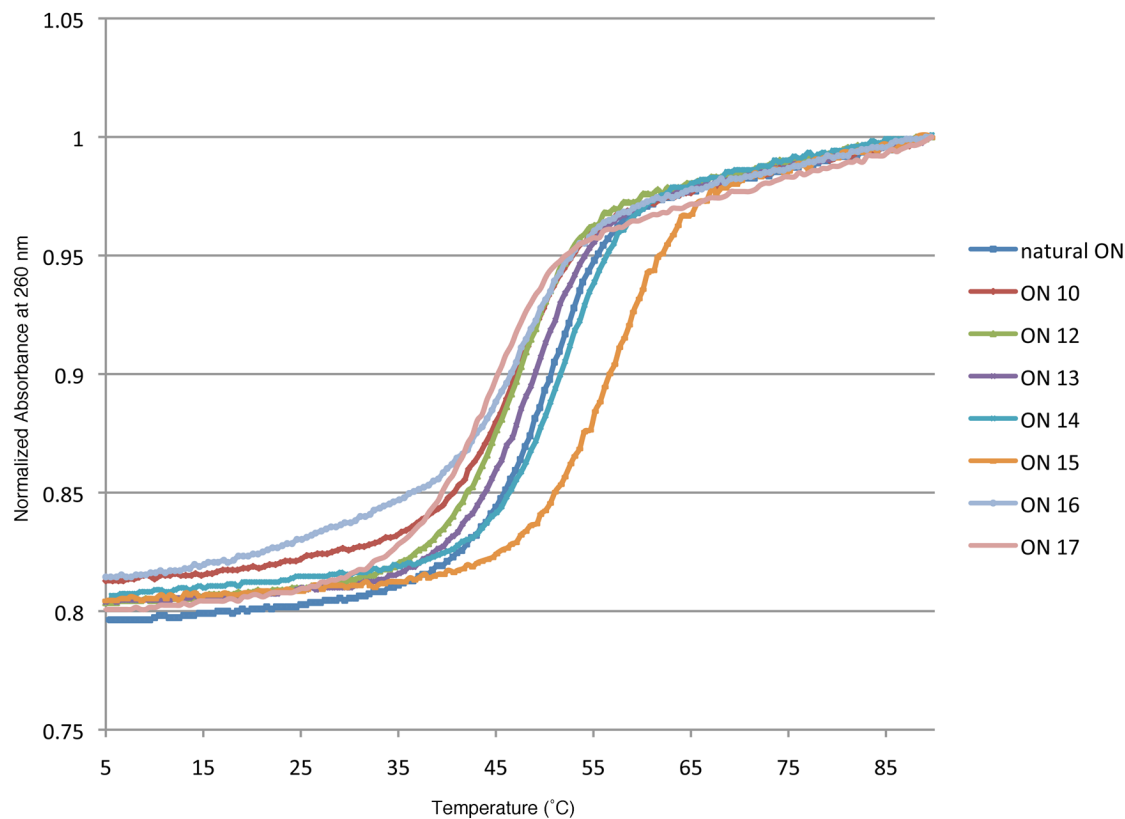

**Figure S1** UV melting curves for the duplexes formed by conjugated ONs and the target DNA strand, 5'-d(AGCAAAAACGC)-3'. Conditions for natural ON and ON **12-17**: 10 mM sodium phosphate buffer (pH = 7.2), 100 mM NaCl solution, and 4  $\mu$ M each oligonucleotide, for ON **10**: 10 mM sodium phosphate buffer (pH= 7.4), 100 mM NaCl solution, 400  $\mu$ M TCEP, and 4  $\mu$ M each oligonucleotide. The melting profiles were recorded at 260 nm from 5 to 90  $^{\circ}$ C at a scan rate of 0.5  $^{\circ}$ C/min.

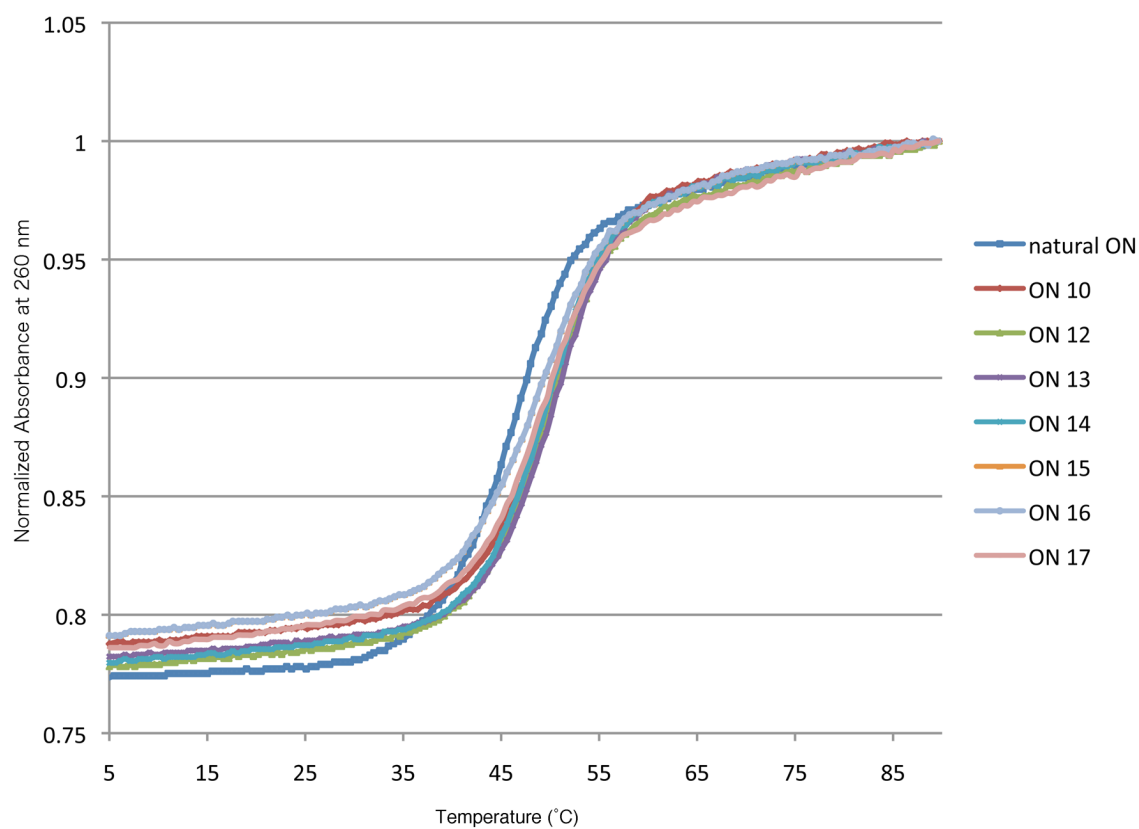

**Figure S2** UV melting curves for the duplexes formed by conjugated ONs and the target RNA strand, 5'-r(AGCAAAAACGC)-3'. Conditions for natural ON and ON **12-17**: 10 mM sodium phosphate buffer (pH = 7.2), 100 mM NaCl solution, and 4  $\mu$ M each oligonucleotide, for ON **10**: 10 mM sodium phosphate buffer (pH= 7.4), 100 mM NaCl solution, 400  $\mu$ M TCEP, and 4  $\mu$ M each oligonucleotide. The melting profiles were recorded at 260 nm from 5 to 90  $^{\circ}$ C at a scan rate of 0.5  $^{\circ}$ C/min.
